# Supplementary material for: Home spirometry in patients with idiopathic pulmonary fibrosis: data from the INMARK trial
Source: PubMed Central journal article supplement (PMC8264778; doi:10.1183/13993003.01518-2020), 2021-07-08

## Supplementary appendix

Table S1. Baseline characteristics of subjects with 100% and <100% adherence to weekly home spirometry

|                                                | 100% adherence to weekly home spirometry (n=108) | <100% adherence to weekly home spirometry (n=238) |
|------------------------------------------------|--------------------------------------------------|---------------------------------------------------|
| Age, years, mean (SD)                          | 69.9 (7.3)                                       | 70.5 (7.4)                                        |
| Male, n (%)                                    | 84 (77.8)                                        | 178 (74.8)                                        |
| Race, n (%)                                    |                                                  |                                                   |
| White                                          | 59 (54.6)                                        | 155 (65.1)                                        |
| Asian                                          | 35 (32.4)                                        | 68 (28.6)                                         |
| Missing                                        | 14 (13.0)                                        | 15 (6.3)                                          |
| Weight, kg, mean (SD)                          | 79.2 (17.0)                                      | 76.9 (15.4)                                       |
| Body mass index, kg/m <sup>2</sup> , mean (SD) | 27.8 (4.5)                                       | 27.2 (4.1)                                        |
| Former or current smoker, n (%)                | 81 (75.0)                                        | 171 (71.8)                                        |
| FVC, mL, mean (SD)                             | 3333 (785)                                       | 3200 (822)                                        |
| FVC, % predicted, mean (SD)                    | 99.2 (15.0)                                      | 96.8 (12.8)                                       |
| DLco*, % predicted, mean (SD)                  | 69.8 (21.2)                                      | 61.3 (18.6)                                       |

100% adherence was defined as the provision of  $\geq 1$  measurement per week for all the weeks the subject was in the trial. \*Corrected for haemoglobin.

Figure S1. Proportion of subjects with 100% adherence to home spirometry by treatment group

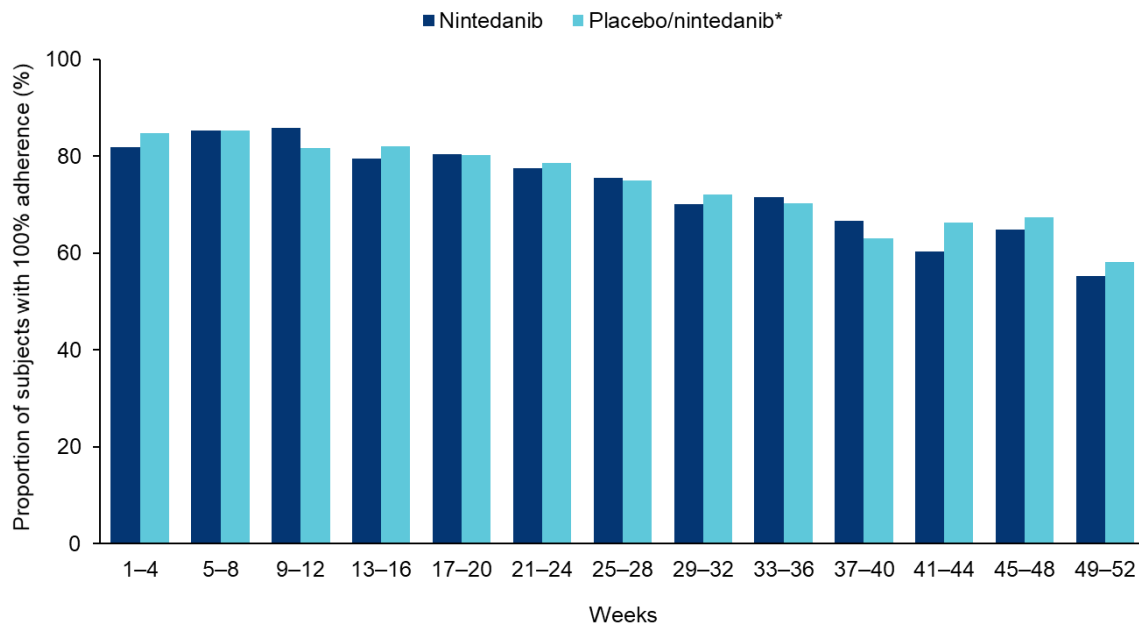

100% adherence was defined as provision of  $\geq 1$  measurement per week for all the weeks that the subject was in the trial. The total number of subjects who were still followed in the trial within the time period was used as the denominator.

\*Subjects received placebo (blinded) for 12 weeks followed by open-label nintedanib for 40 weeks.

Figure S2. Timing of home spirometry among subjects who provided only one measurement in a given day

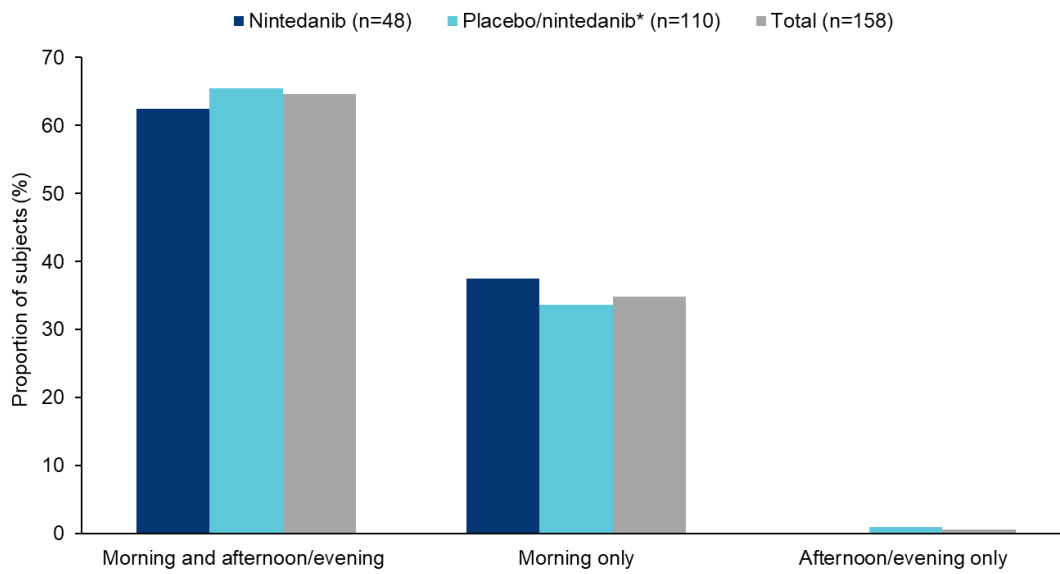

Morning measurements were taken between 05:00 and 12:00 (inclusive). Afternoon/evening measurements were taken after 12:00 and before 05:00.  
\*Subjects received placebo (blinded) for 12 weeks followed by open-label nintedanib for 40 weeks.

Figure S3. Timing of home spirometry among subjects who provided multiple measurements on at least 1 day

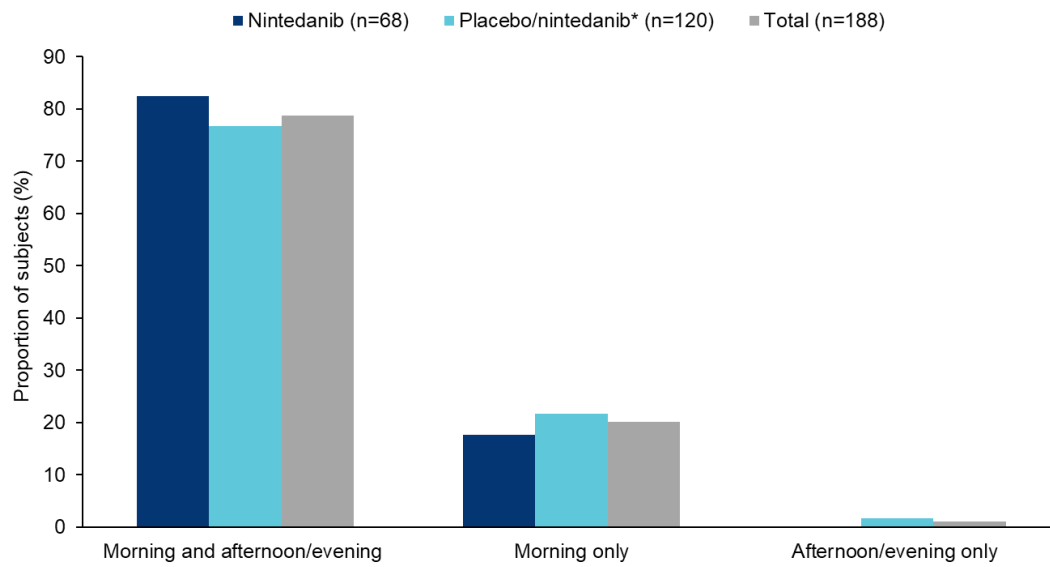

The number of subjects who provided multiple measurements on at least 1 day was used as the denominator.  
Morning measurements were taken between 05:00 and 12:00 (inclusive). Afternoon/evening measurements were taken after 12:00 and before 05:00.  
\*Subjects received placebo (blinded) for 12 weeks followed by open-label nintedanib for 40 weeks.

Figure S4. FVC (mL) based on home spirometry measured in the morning and the afternoon/evening

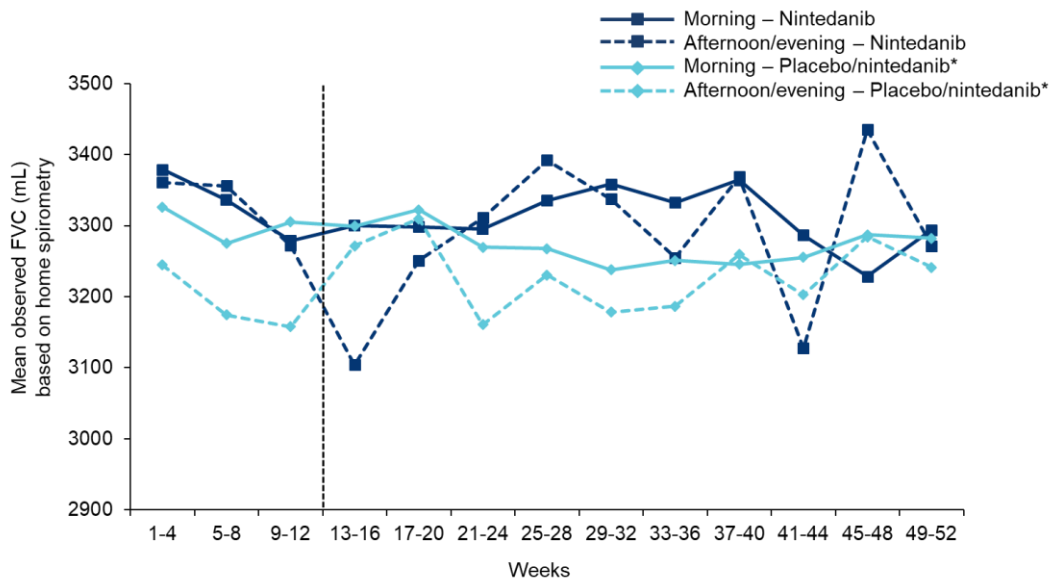

| No. of subjects                         | 1-4 | 5-8 | 9-12 | 13-16 | 17-20 | 21-24 | 25-28 | 29-32 | 33-36 | 37-40 | 41-44 | 45-48 | 49-52 |
|-----------------------------------------|-----|-----|------|-------|-------|-------|-------|-------|-------|-------|-------|-------|-------|
| Morning - Nintedanib                    | 112 | 108 | 109  | 107   | 107   | 105   | 96    | 93    | 91    | 88    | 88    | 87    | 89    |
| Afternoon/evening - Nintedanib          | 45  | 55  | 51   | 44    | 45    | 47    | 47    | 45    | 50    | 38    | 38    | 47    | 42    |
| Morning - Placebo/nintedanib*           | 218 | 216 | 208  | 206   | 205   | 197   | 195   | 190   | 187   | 180   | 171   | 170   | 168   |
| Afternoon/evening - Placebo/nintedanib* | 84  | 84  | 91   | 84    | 88    | 85    | 82    | 73    | 70    | 70    | 81    | 76    | 69    |

\*Subjects received placebo (blinded) for 12 weeks followed by open-label nintedanib for 40 weeks.  
Morning measurements were taken between 05:00 and 12:00 (inclusive). Afternoon/evening measurements were taken after 12:00 and before 05:00.

Figure S5. Clinic- and home-measured FVC (mL) over time in subjects initially randomised to nintedanib (a) or placebo (b–g) who had an acute exacerbation

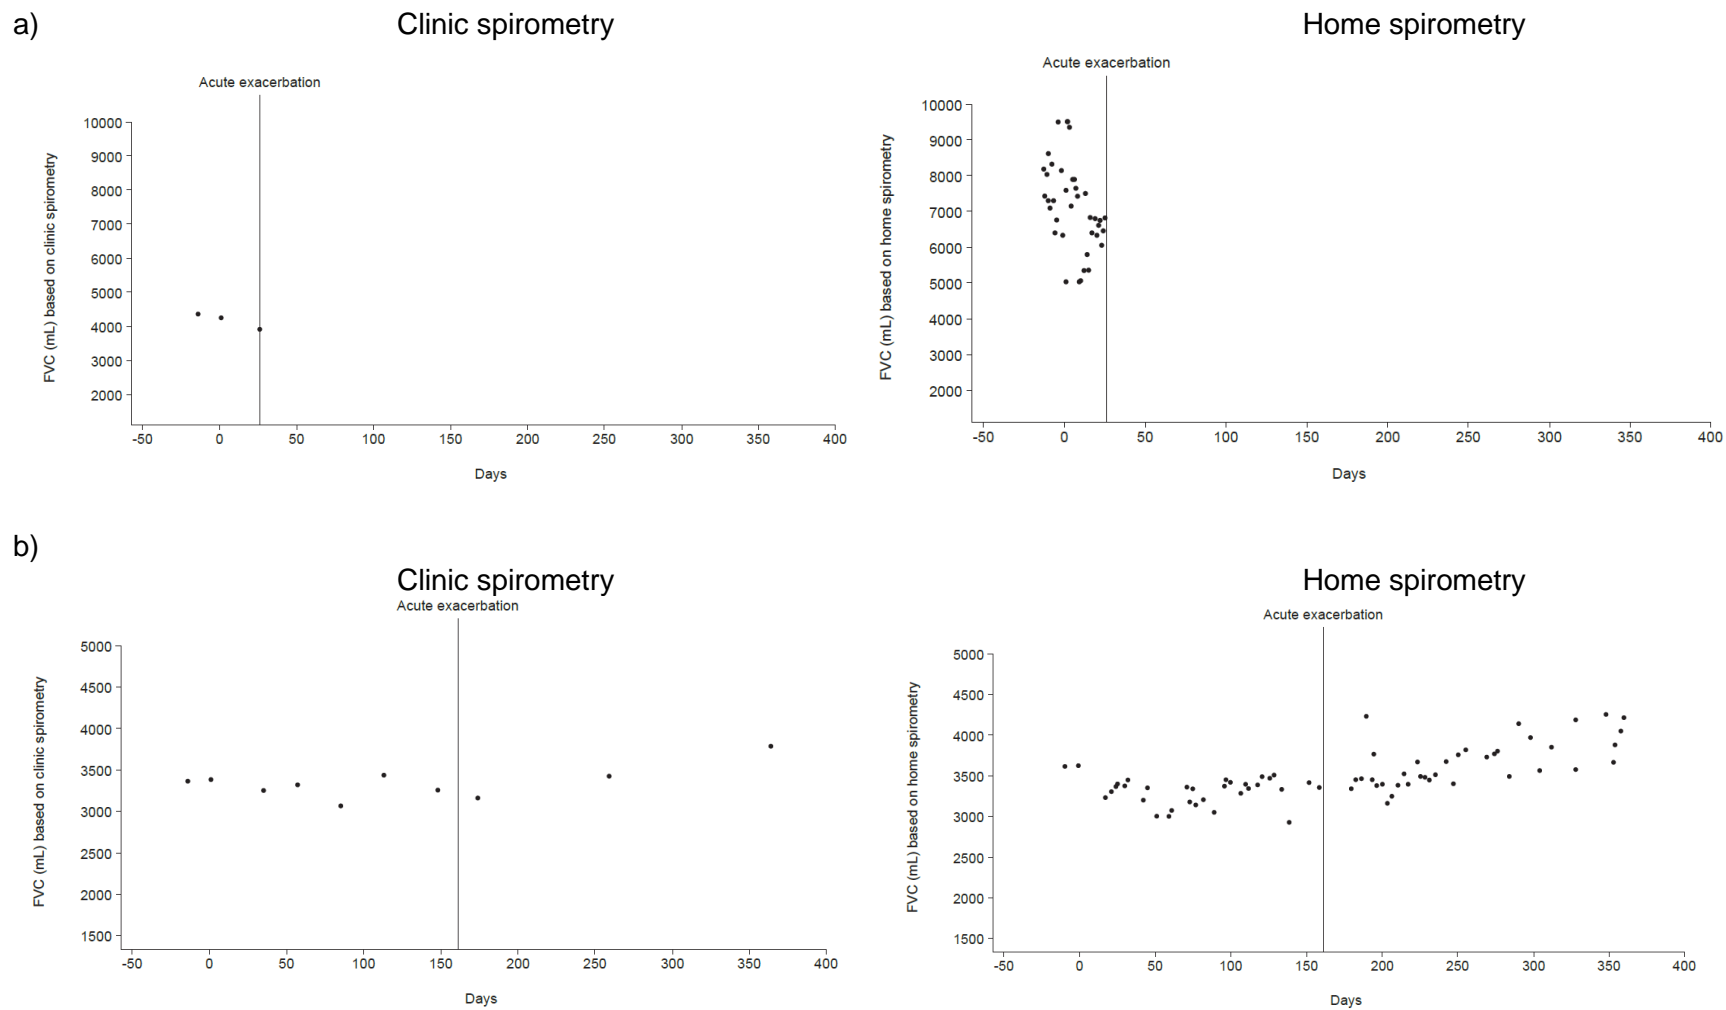

c)

Clinic spirometry

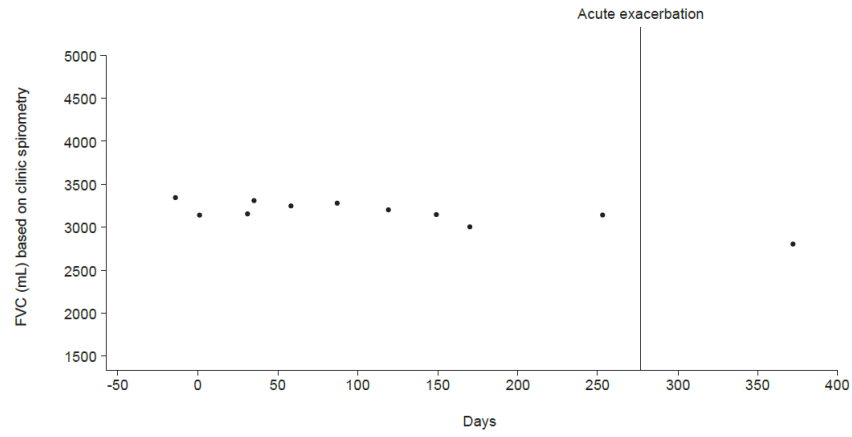

Home spirometry

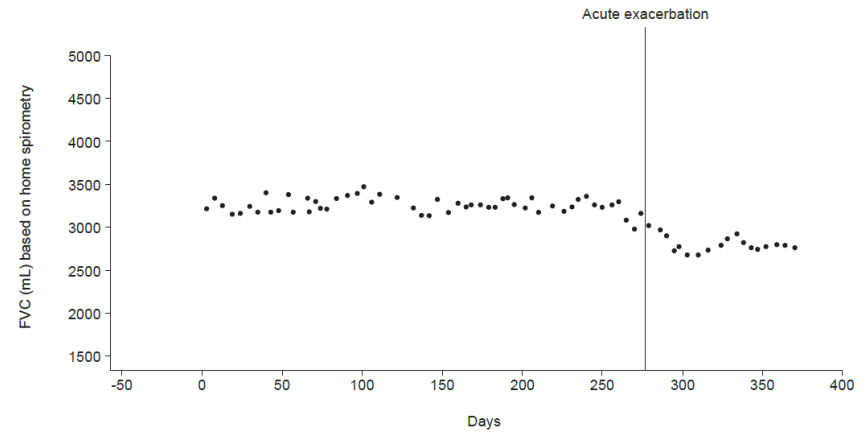

d)

Clinic spirometry

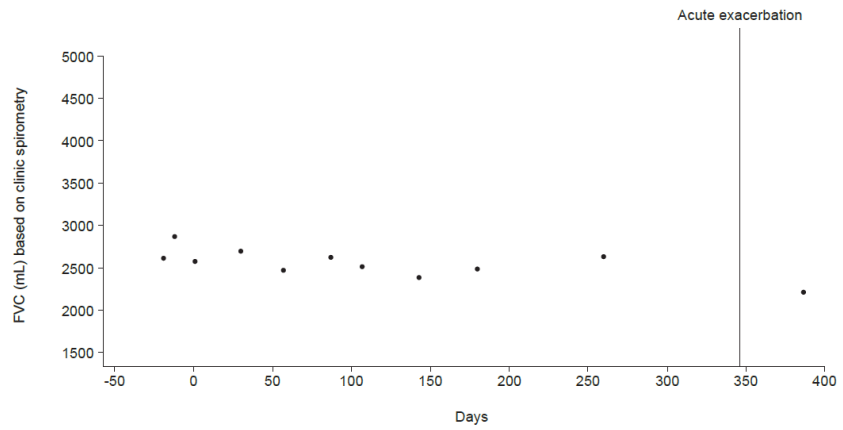

Home spirometry

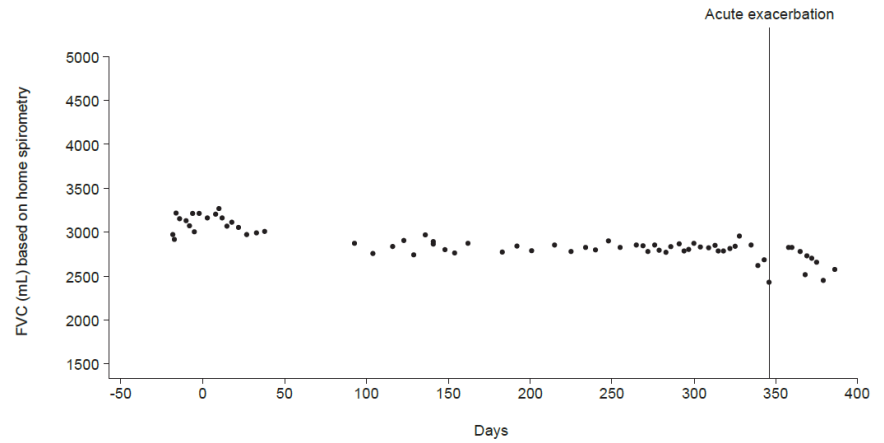

e)

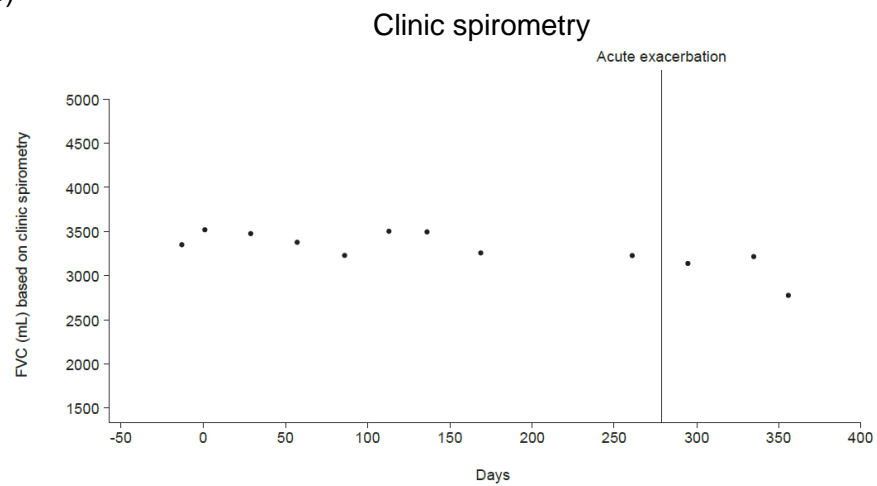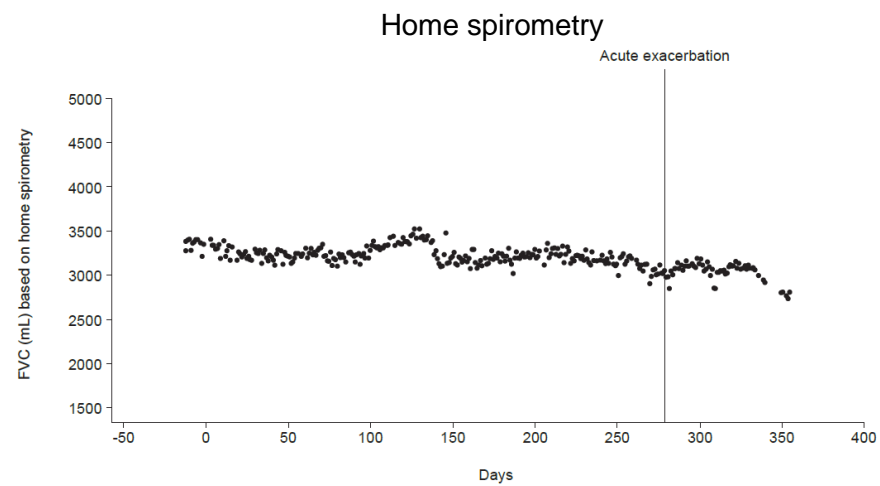

f)

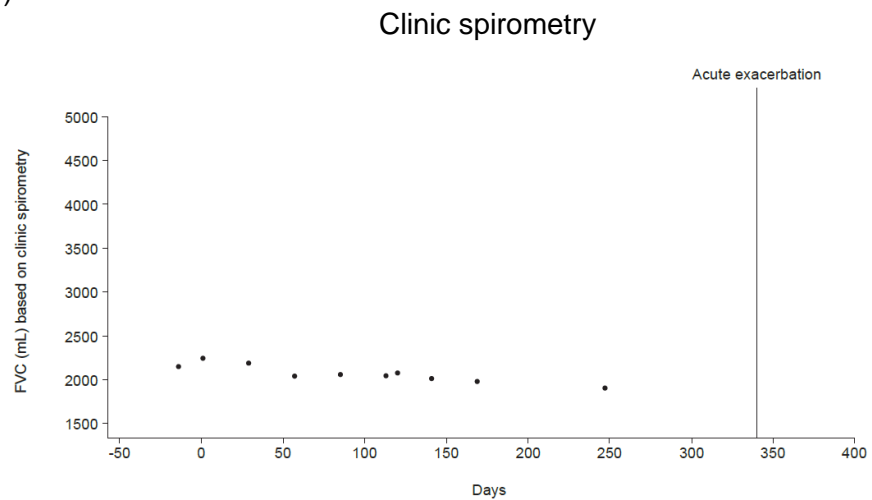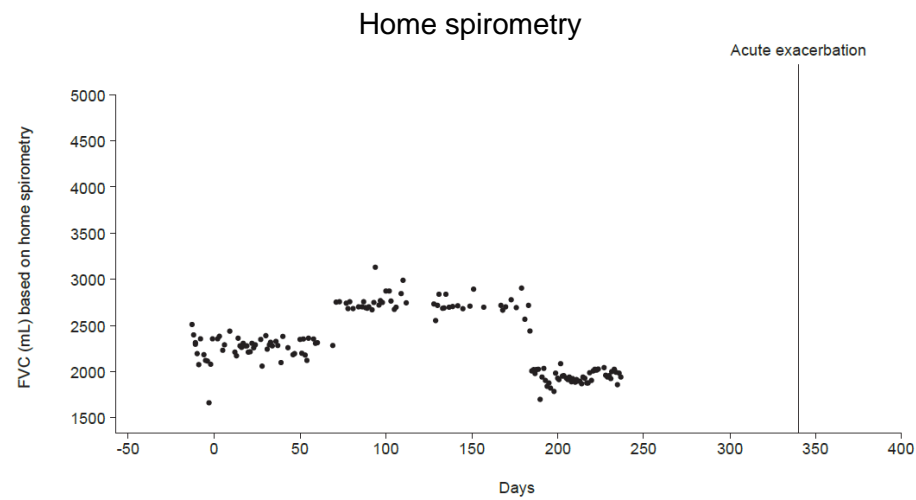



g)

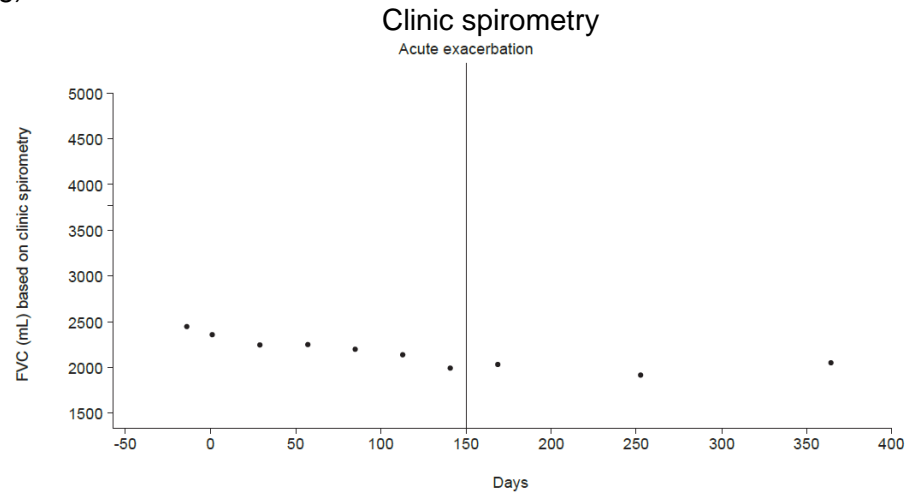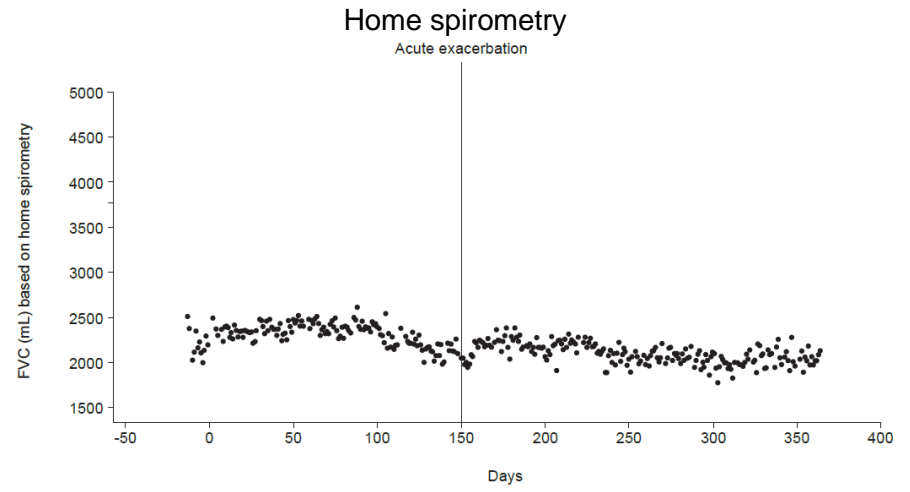

h)

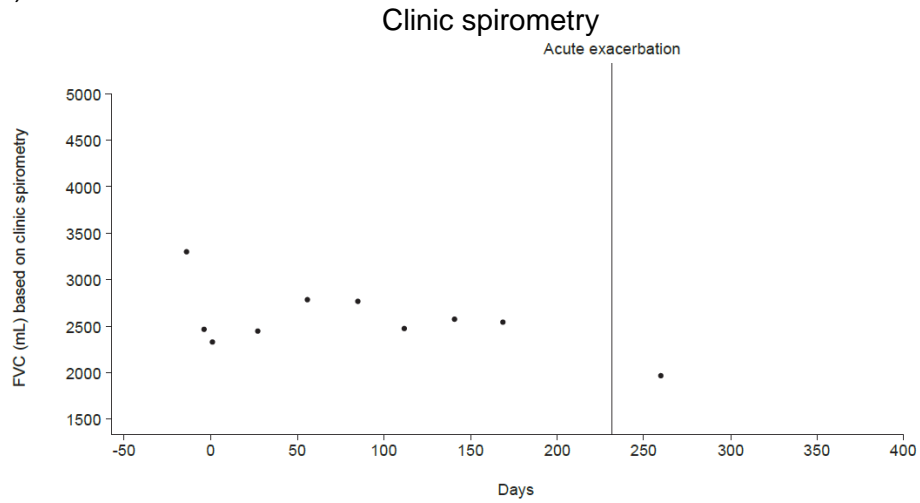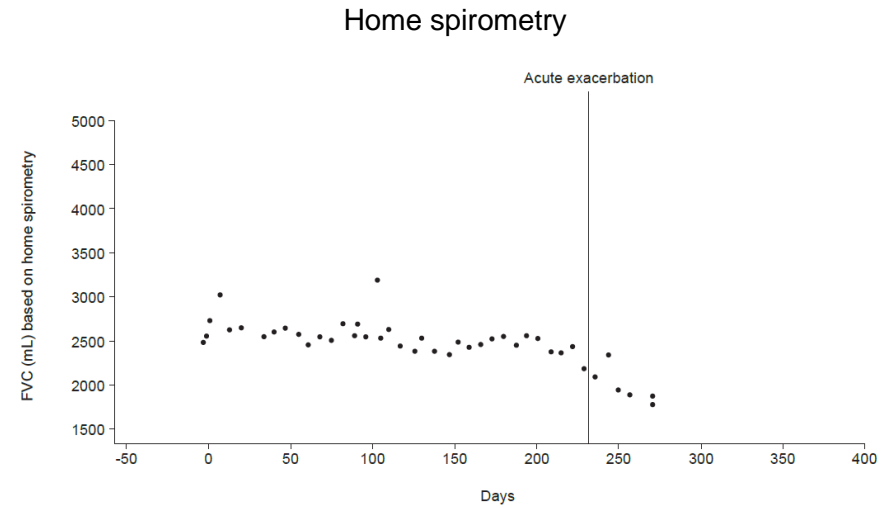

Supplement: ERJ-01518-2020.SUPPLEMENT.pdf [file ERJ-01518-2020.SUPPLEMENT.pdf]
